# Supplementary material for: Constructing a fluorescent probe for specific detection of cysteine over homocysteine and glutathione based on a novel cysteine-binding group but-3-yn-2-one
Source: Royal Society of Chemistry journal article supplement (doi:10.1039/c4an00639a), 2014-01-01
Supplement: c4an00639a1.pdf [file c4an00639a1.pdf]

## Supporting Information

### Constructing fluorescent probe for specific detection of cysteine over homocysteine and glutathione based on a novel cysteine-binding group but-3-yn-2-one

Yawei Liu,<sup>a</sup> Song Zhang,<sup>b</sup> Xin Lv,<sup>a</sup> Yuan-Qiang Sun,<sup>a</sup> Jing Liu,<sup>a</sup> and Wei Guo<sup>\*a</sup>

<sup>a</sup> School of Chemistry and Chemical Engineering and Institute of Biotechnology, Shanxi University, Taiyuan 030006, China.

<sup>b</sup> Shanxi Academy of Analytical Sciences

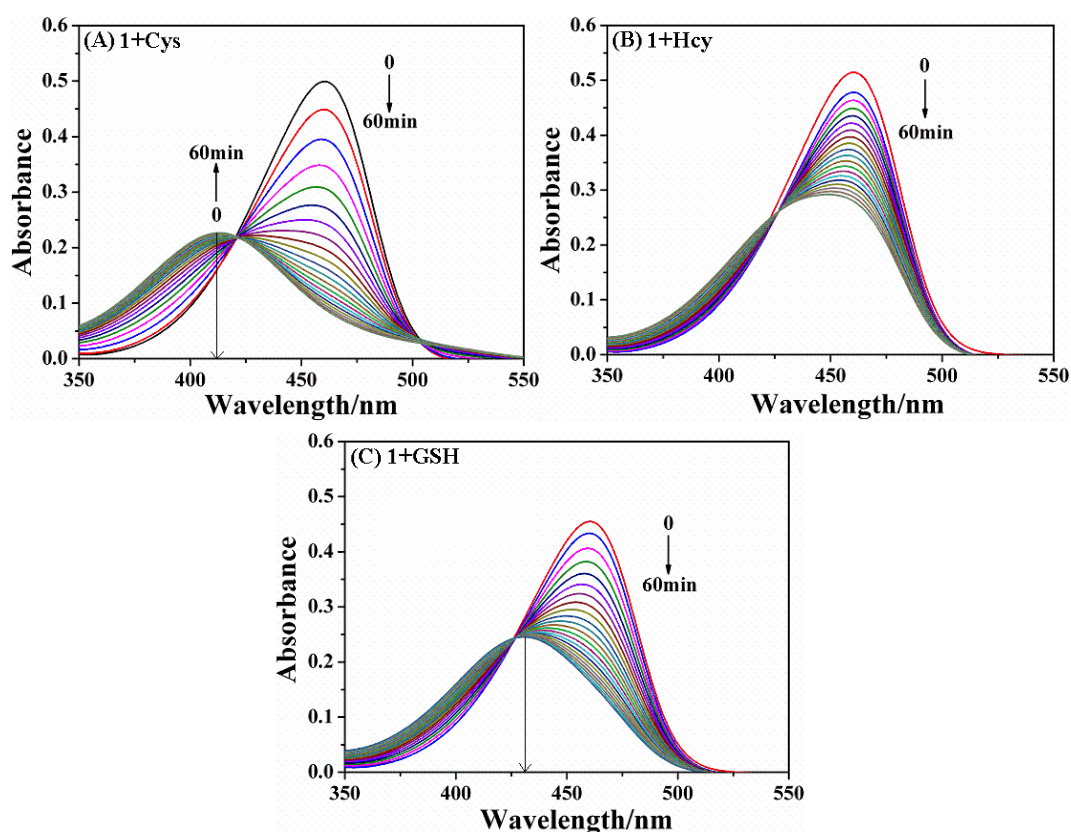

**Figure S1** Time-dependent absorption spectra of **1** (10 μM) in the presence of 20 equiv of Cys (A), Hcy (B), and GSH (C) in PBS buffer (20 mM, pH 7.4) at 37 °C.

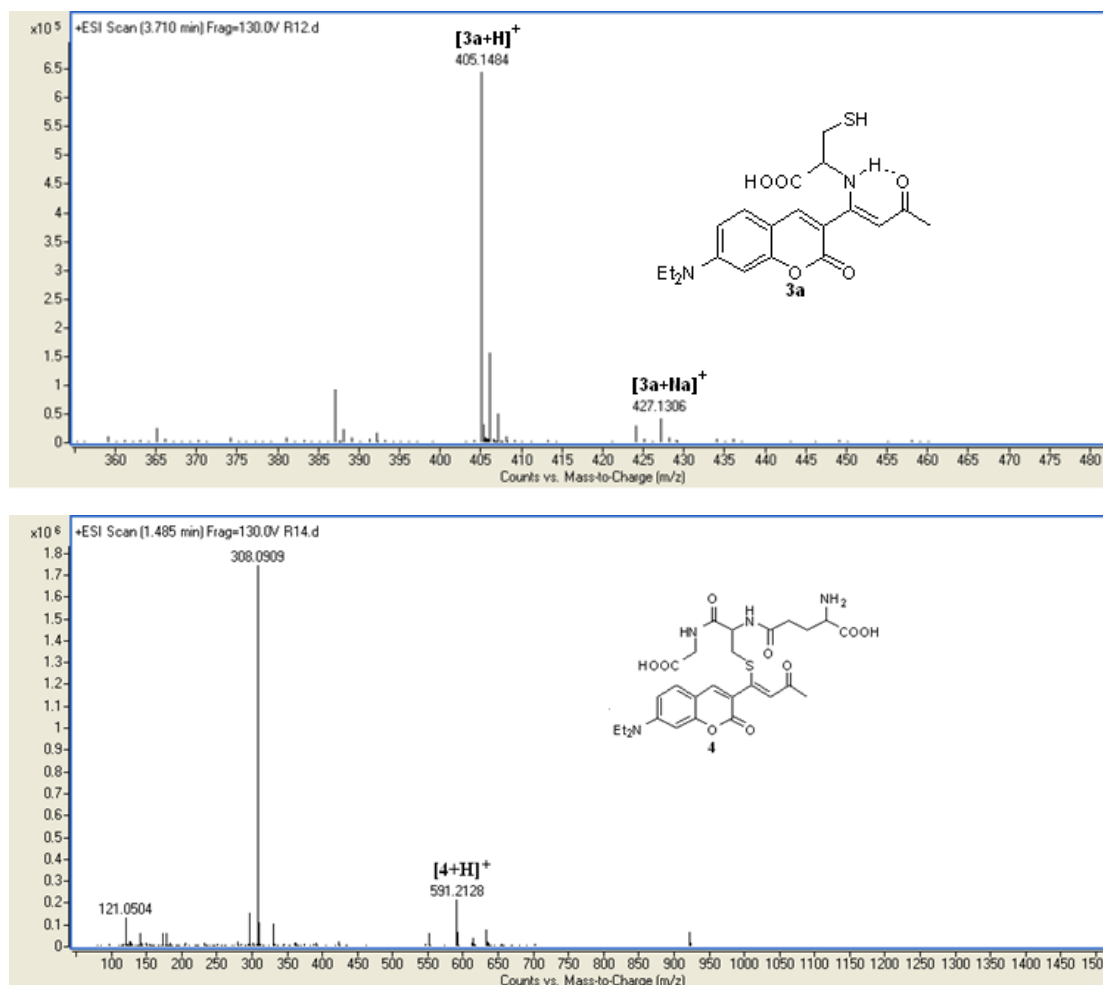

Figure S2 HRMS charts of **1** treated with excess of Cys (above) or GSH (below).

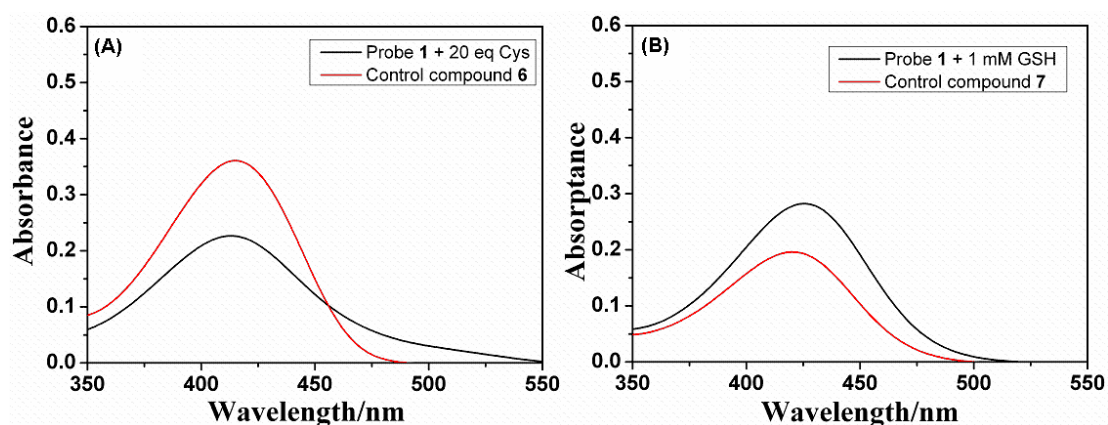

Figure S3 Absorption spectrum of **1** (10  $\mu$ M) upon addition of 20 equiv of Cys (A) (or Hcy (B)) vs that of control compound **6** (**7**).

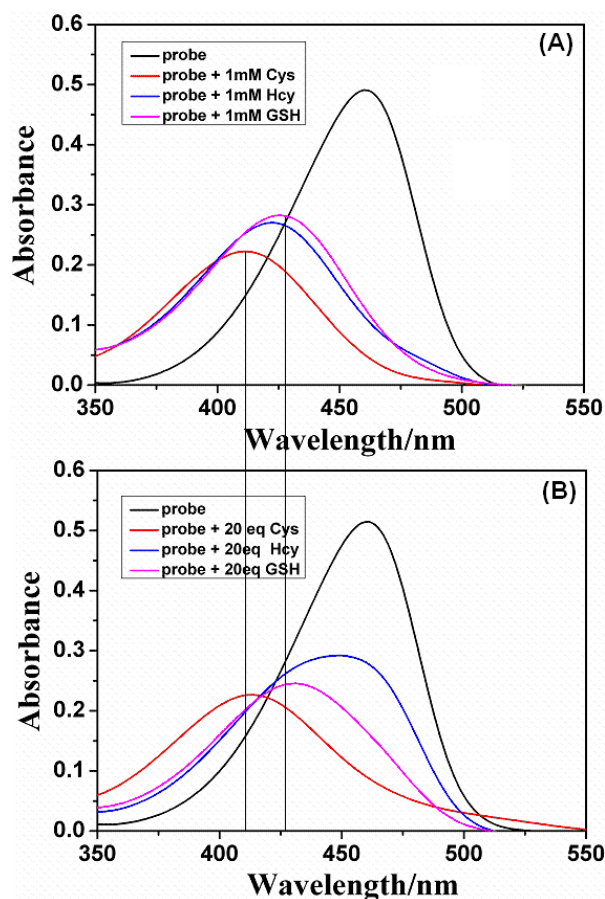

**Figure S4** Absorption spectra of **1** (10 μM) treated with 1 mM (above) and 0.2 mM (20 equiv, below) of Cys, Hcy, and GSH, respectively, in PBS buffer (20 mM, pH 7.4) at 37 °C after 60 min.

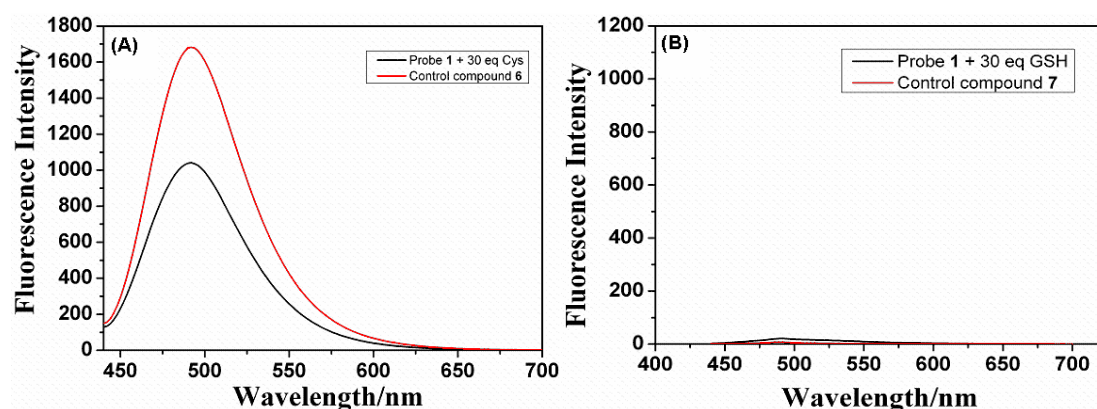

**Figure S5** (A) Fluorescence spectrum of probe **1** (5 μM) treated with 30 equiv. of Cys vs that control compound **6**. (B) Fluorescence spectrum of probe **1** (5 μM) treated with 30 equiv. of GSH vs that control compound **7**.

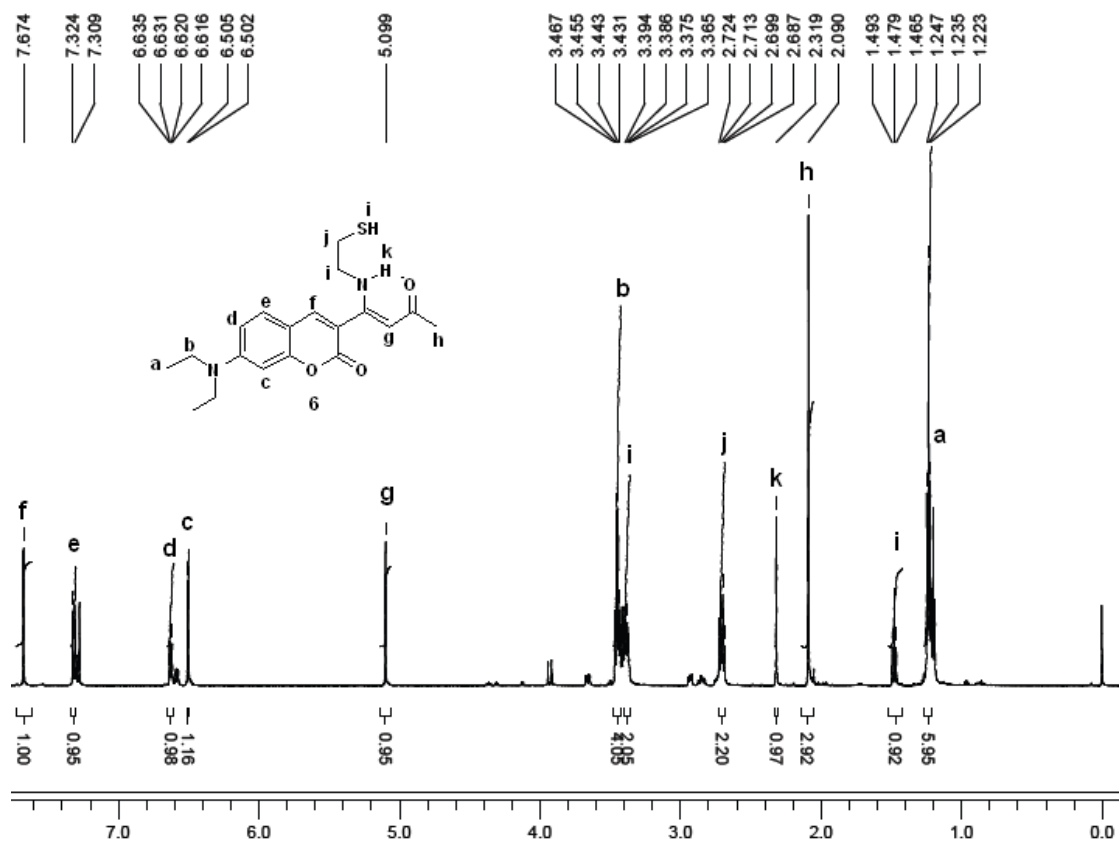

**Figure S6** <sup>1</sup>H NMR charts of **6** (CDCl<sub>3</sub>, 600 MHz).

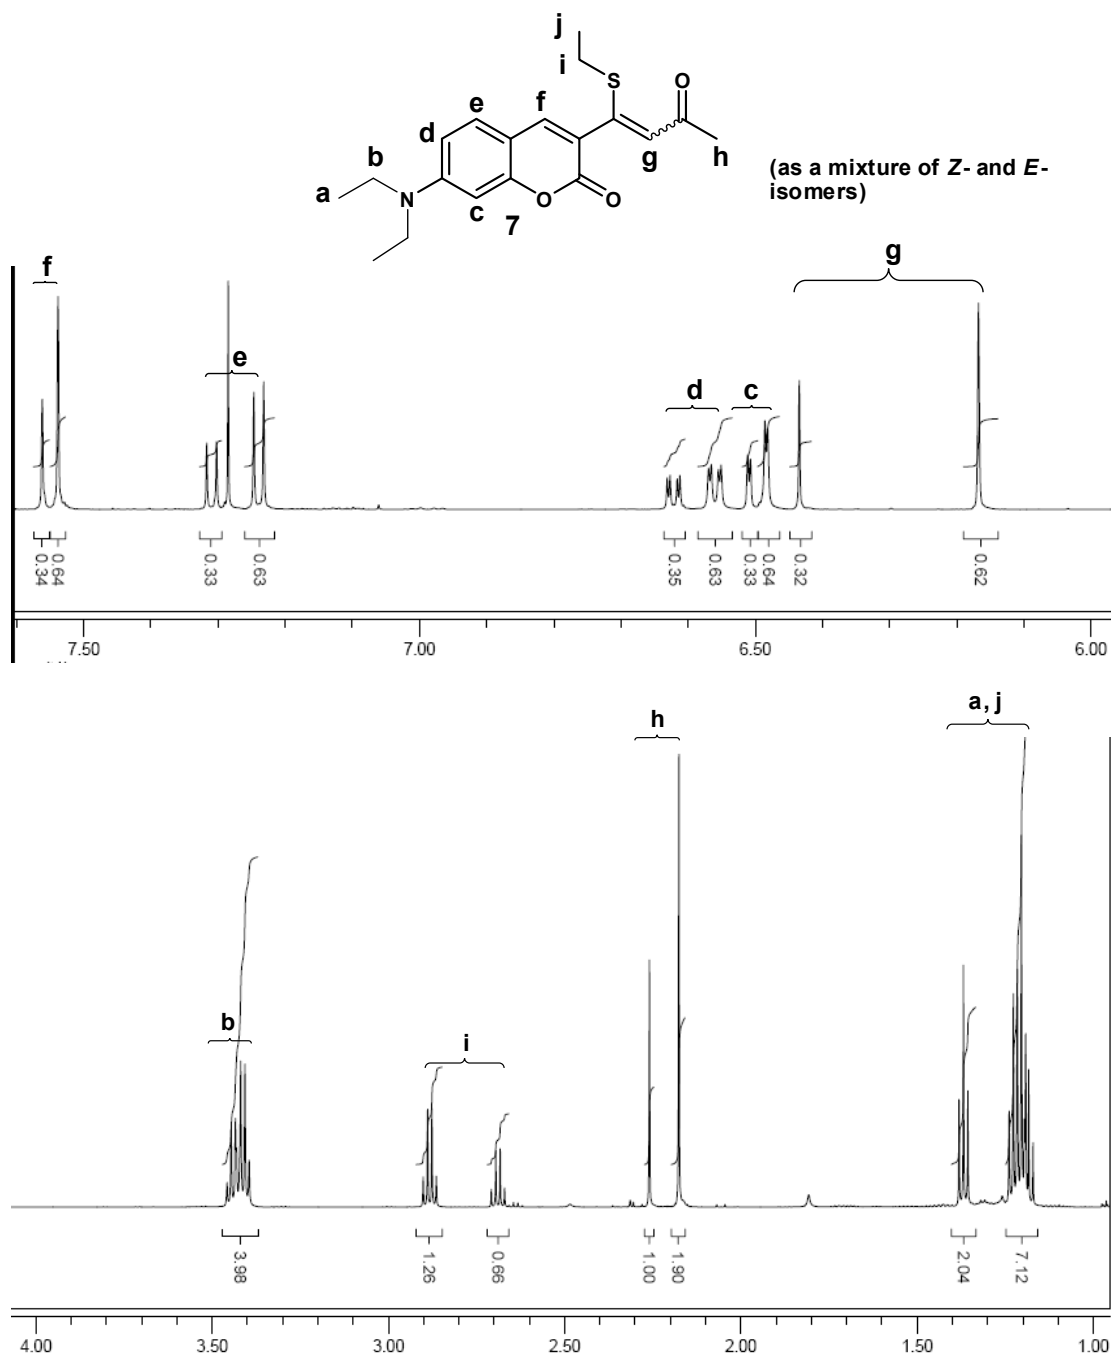

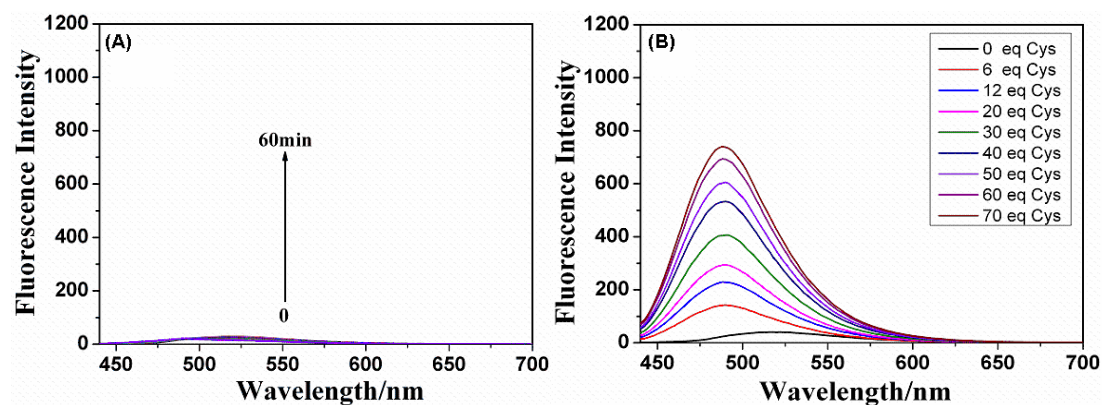

**Figure S8** (A) Time-dependent fluorescence spectra of probe **1** (5 μM) treated with 1 mM of GSH. (B) Fluorescence spectra of probe **1** treated with the mixtures of GSH (1 mM)/Cys (0–70 equiv).

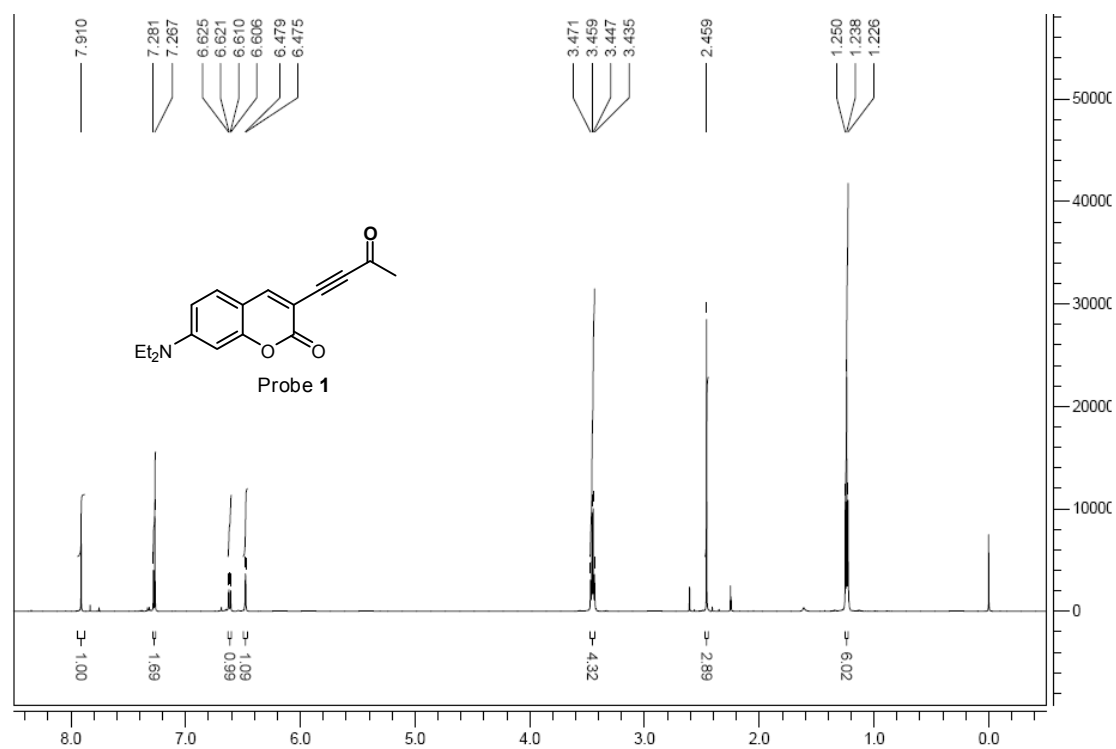

**Figure S9** <sup>1</sup>H NMR charts of probe **1** (CDCl<sub>3</sub>, 600 MHz).

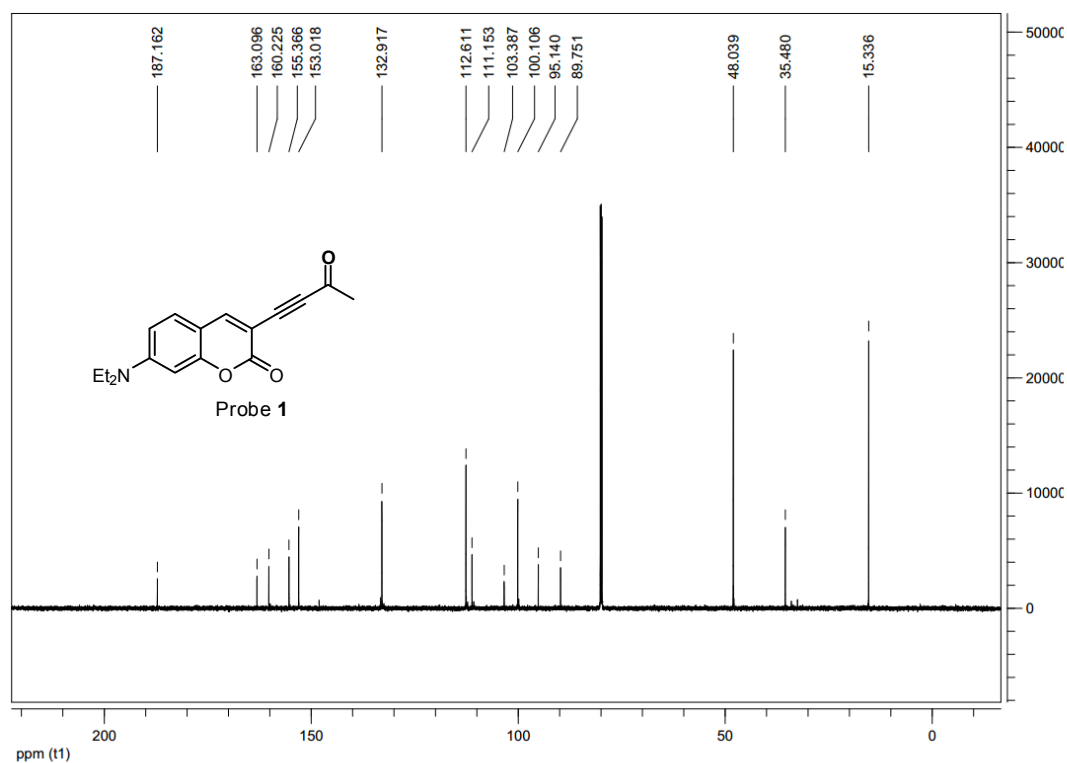

**Figure S10**  $^{13}\text{C}$  NMR charts of probe **1** ( $\text{CDCl}_3$ , 150 MHz).

| Sample         | Formula (M)                                    | Ion Formula                                    | Measured m/z | Calc m/z | Diff (ppm) |
|----------------|------------------------------------------------|------------------------------------------------|--------------|----------|------------|
| Probe <b>1</b> | $\text{C}_{17}\text{H}_{17}\text{N}\text{O}_3$ | $\text{C}_{17}\text{H}_{18}\text{N}\text{O}_3$ | 284.1284     | 284.1281 | -0.91      |

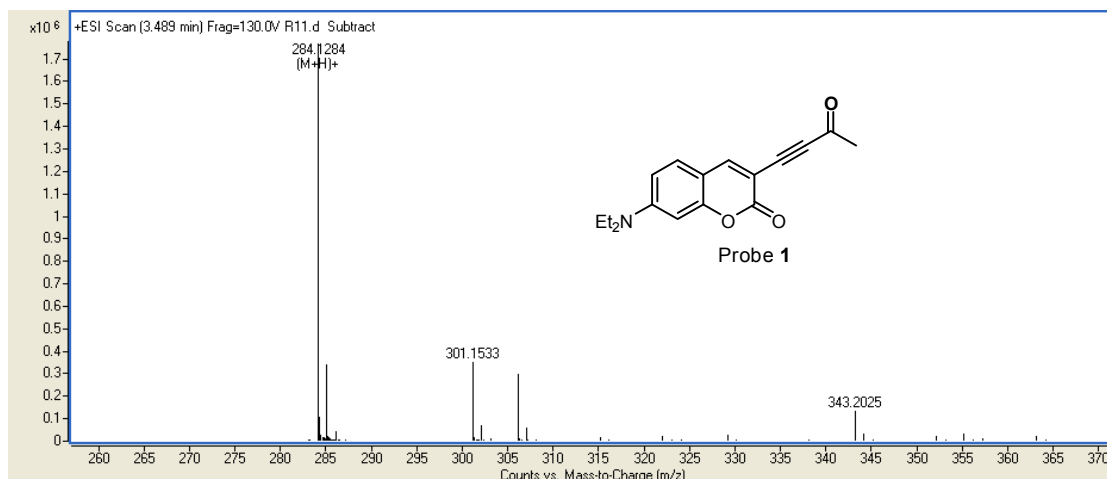

**Figure S11** HRMS charts of probe **1**.

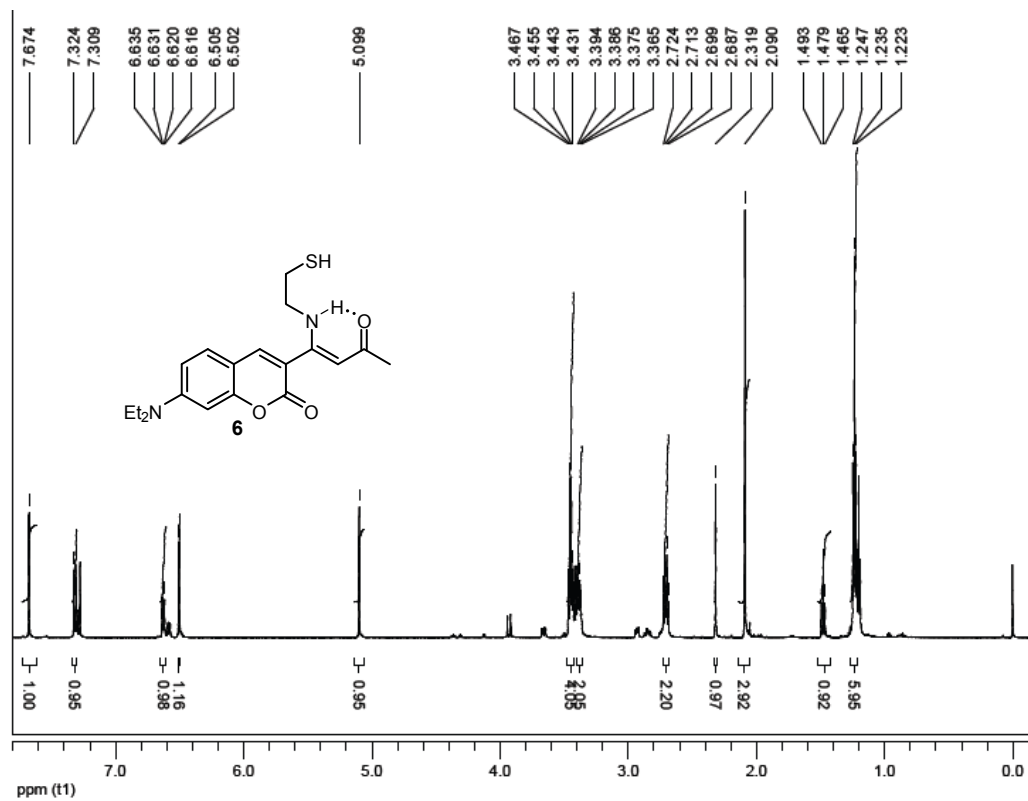

**Figure S12**  $^1\text{H}$  NMR charts of **6** ( $\text{CDCl}_3$ , 600 MHz).

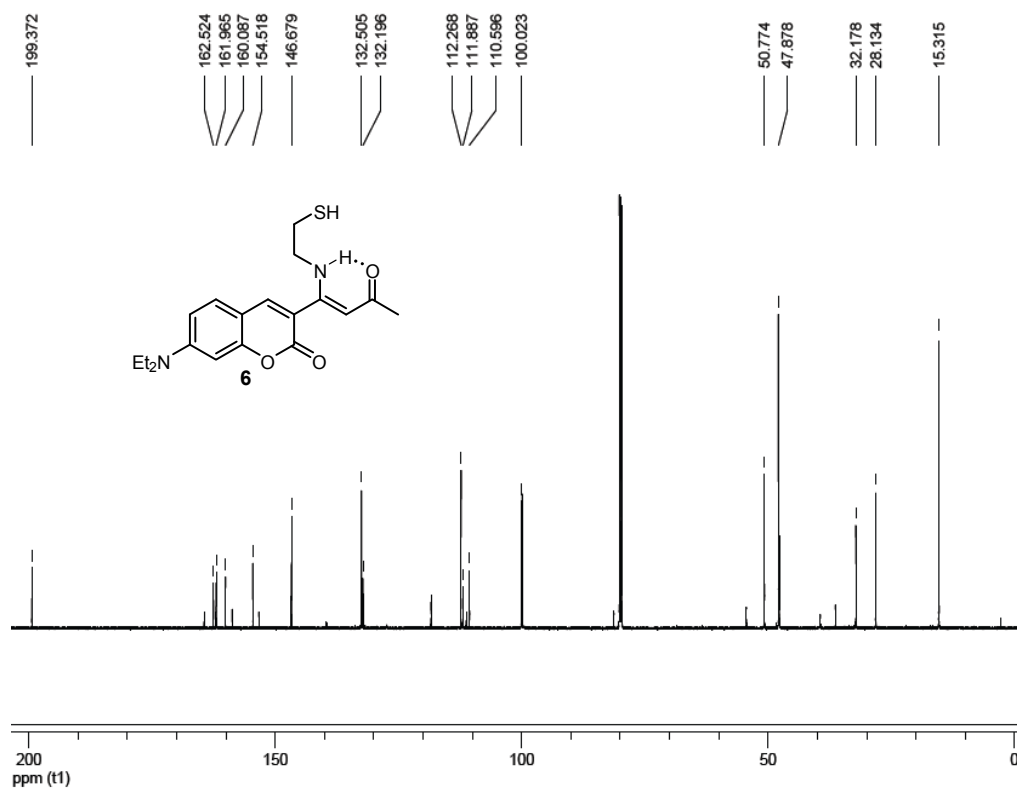

**Figure S13**  $^{13}\text{C}$  NMR charts of **6** ( $\text{CDCl}_3$ , 150 MHz).



1\_140311133832 #246 RT: 4.09 AV: 1 NL: 1.82E7  
T: FTMS + p ESI Full ms [50.00-2000.00]

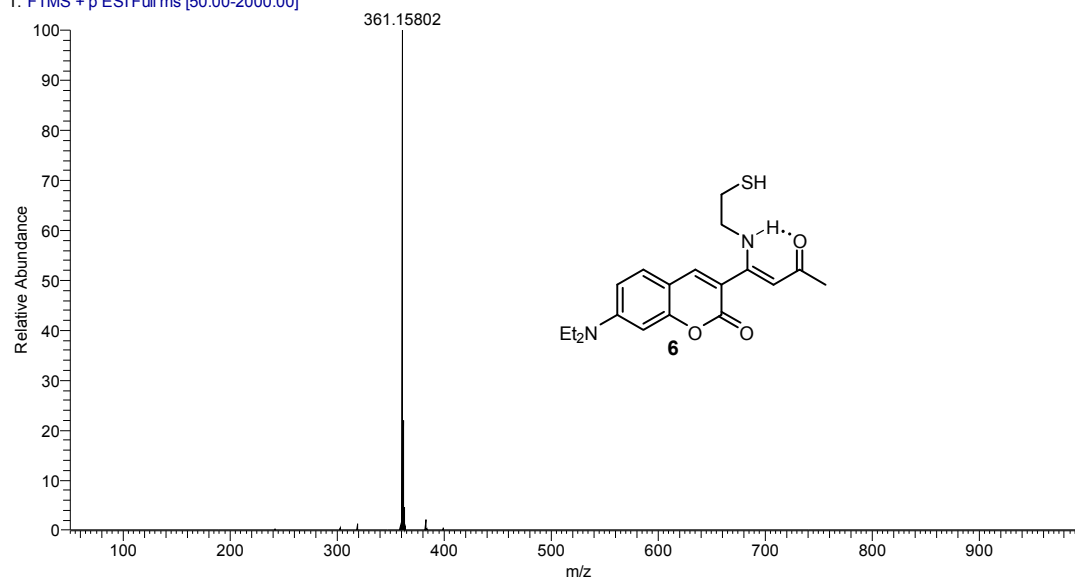

Figure S14 HRMS charts of 6.

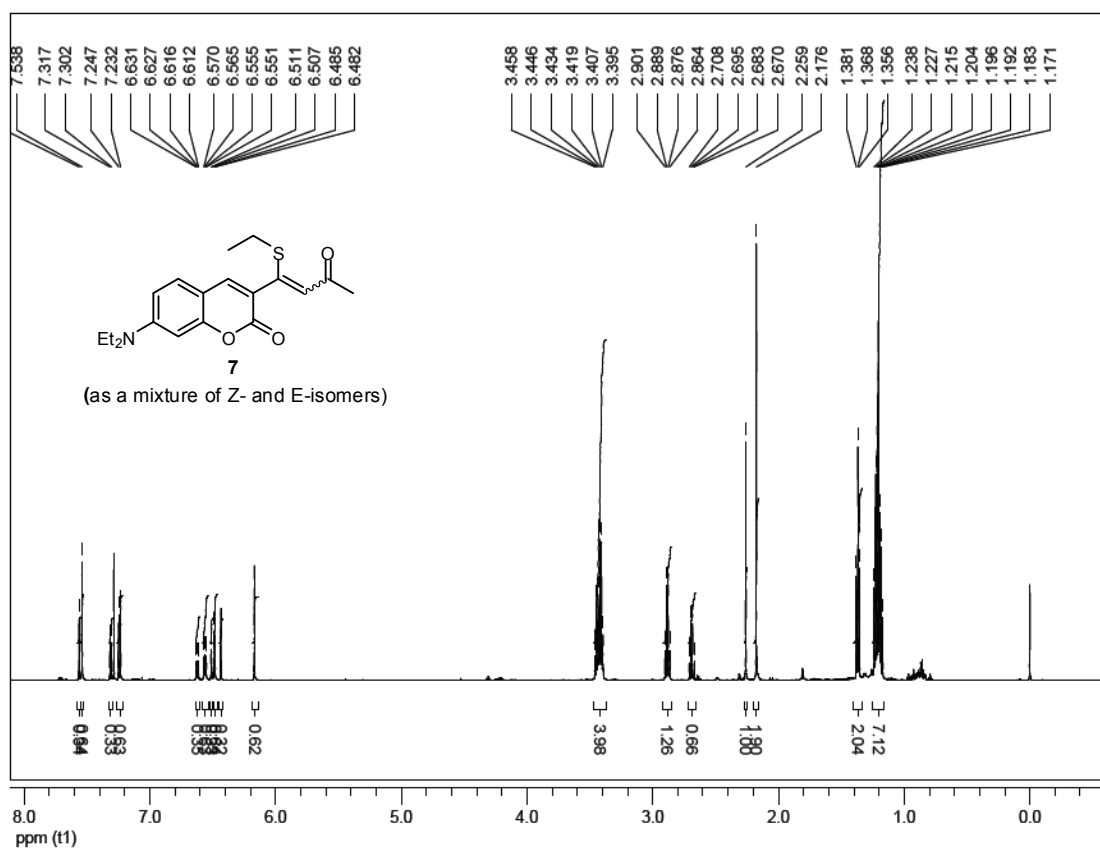

Figure S15 <sup>1</sup>H NMR charts of 7 (CDCl<sub>3</sub>, 600 MHz).

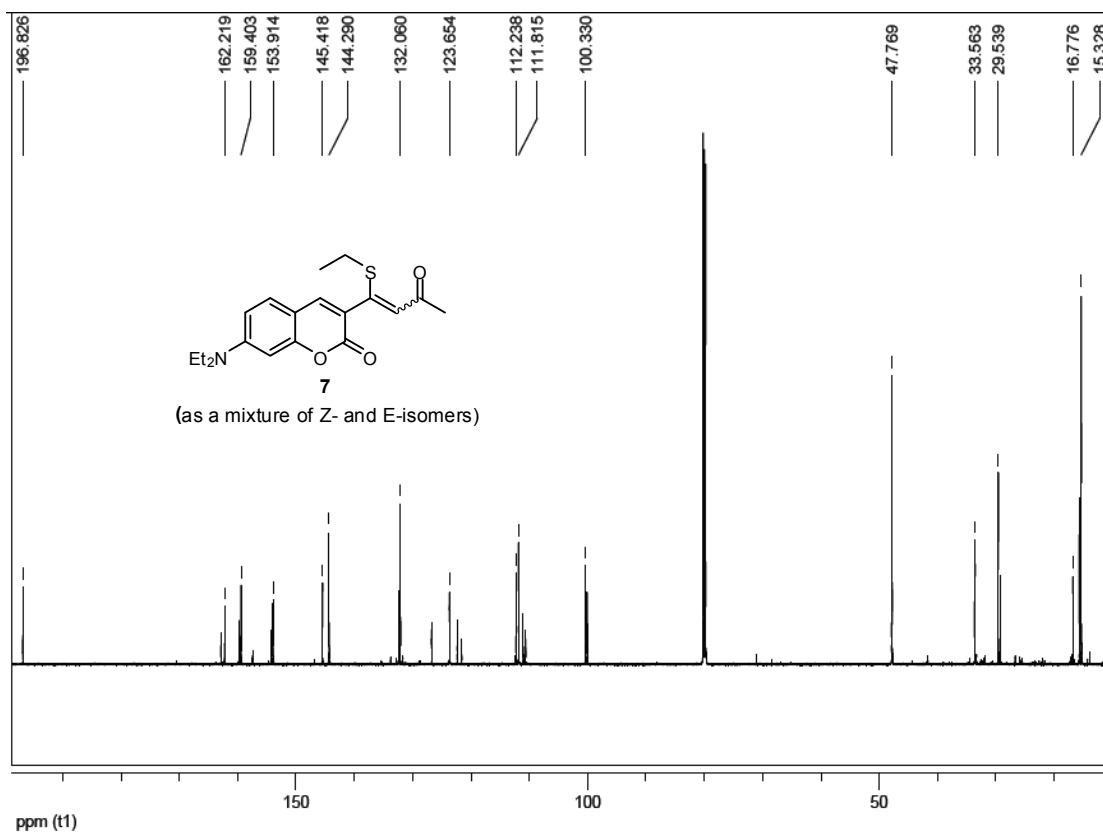

**Figure S16**  $^{13}\text{C}$  NMR charts of **7** ( $\text{CDCl}_3$ , 150 MHz).

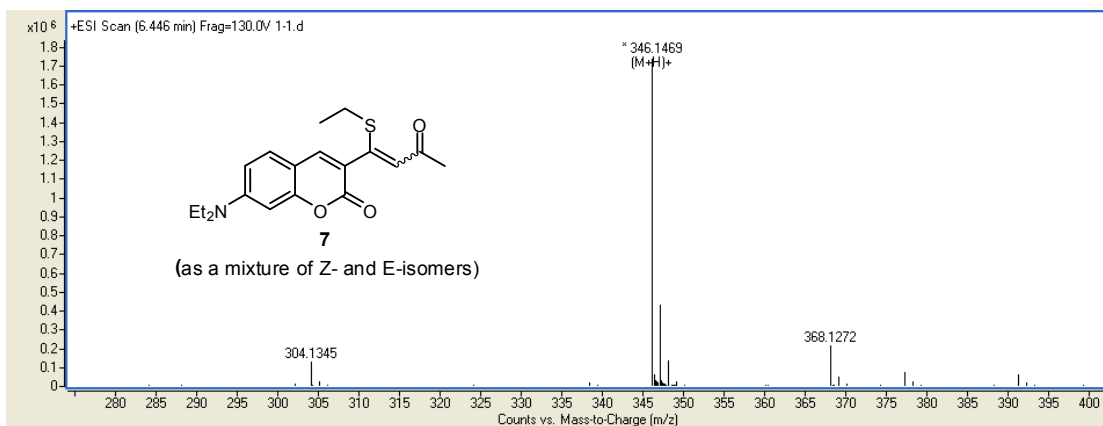

**Figure S17** HRMS charts of **7**.
